# Supplementary material for: High-Throughput Method for Wide-Coverage and Quantitative Phenolic Fingerprinting in Plant-Origin Foods and Urine Samples
Source: PubMed Central journal article supplement (PMC10550202; doi:10.1021/acs.jafc.2c01453), 2022-06-15
Supplement: jf2c01453_si_001.pdf [file jf2c01453_si_001.pdf]

## Supporting Information

### High-Throughput Method for Wide-Coverage and Quantitative Phenolic Fingerprinting in Plant-Origin Foods and Urine Samples

Raúl González-Domínguez<sup>1,2,\*</sup>, Ana Sayago<sup>1,2</sup>, María Santos-Martín<sup>1,2</sup>, Ángeles Fernández-Recamales<sup>1,2,\*</sup>

<sup>1</sup>Agrifood Laboratory, Faculty of Experimental Sciences, University of Huelva. 21007 Huelva, Spain. <sup>2</sup>International Campus of Excellence Ceia3, University of Huelva. 21007 Huelva, Spain.

\*Corresponding authors: Dr. Raúl González-Domínguez, Tel. +34 959219975, email: raul.gonzalez@dqcm.uhu.es; Dr. Ángeles Fernández-Recamales, Tel. +34 959219958, email: recamale@dqcm.uhu.es

**Table S1.** Details about the preparation of standard solutions.

| <b>metabolite</b>                  | <b>Molecular formula</b>                       | <b>Stock solvent</b> |
|------------------------------------|------------------------------------------------|----------------------|
| <i>Multi-metabolite solution A</i> |                                                |                      |
| Benzoic acid                       | C <sub>7</sub> H <sub>6</sub> O <sub>2</sub>   | Methanol             |
| 4-Hydroxybenzoic acid              | C <sub>7</sub> H <sub>6</sub> O <sub>3</sub>   | Methanol             |
| 3,4-Dihydroxybenzoic acid          | C <sub>7</sub> H <sub>6</sub> O <sub>4</sub>   | Methanol             |
| Vanillic acid                      | C <sub>8</sub> H <sub>8</sub> O <sub>4</sub>   | Methanol             |
| Gallic acid                        | C <sub>7</sub> H <sub>6</sub> O <sub>5</sub>   | Methanol             |
| 4-O-Methylgallic acid              | C <sub>8</sub> H <sub>8</sub> O <sub>5</sub>   | Methanol             |
| Syringic acid                      | C <sub>9</sub> H <sub>10</sub> O <sub>5</sub>  | Methanol             |
| 4-Hydroxyphenylacetic acid         | C <sub>8</sub> H <sub>8</sub> O <sub>3</sub>   | Methanol             |
| 3,4-Dihydroxyphenylacetic acid     | C <sub>8</sub> H <sub>8</sub> O <sub>4</sub>   | Methanol             |
| trans-Cinnamic acid                | C <sub>9</sub> H <sub>8</sub> O <sub>2</sub>   | Methanol             |
| o-Coumaric acid                    | C <sub>9</sub> H <sub>8</sub> O <sub>3</sub>   | Methanol             |
| m-Coumaric acid                    | C <sub>9</sub> H <sub>8</sub> O <sub>3</sub>   | Methanol             |
| p-Coumaric acid                    | C <sub>9</sub> H <sub>8</sub> O <sub>3</sub>   | Methanol             |
| Caffeic acid                       | C <sub>9</sub> H <sub>8</sub> O <sub>4</sub>   | Methanol             |
| Ferulic acid                       | C <sub>10</sub> H <sub>10</sub> O <sub>4</sub> | Methanol             |
| 3-Caffeoylquinic acid              | C <sub>16</sub> H <sub>18</sub> O <sub>9</sub> | Methanol             |
| Sinapic acid                       | C <sub>11</sub> H <sub>12</sub> O <sub>5</sub> | Methanol             |
| 3-(4-Hydroxyphenyl)propionic acid  | C <sub>9</sub> H <sub>10</sub> O <sub>3</sub>  | Methanol             |
| 4-Hydroxybenzaldehyde              | C <sub>7</sub> H <sub>6</sub> O <sub>2</sub>   | Methanol             |
| 3,4-Dihydroxybenzaldehyde          | C <sub>7</sub> H <sub>6</sub> O <sub>3</sub>   | Methanol             |
| Vanillin                           | C <sub>8</sub> H <sub>8</sub> O <sub>3</sub>   | Methanol             |
| Syringaldehyde                     | C <sub>9</sub> H <sub>10</sub> O <sub>4</sub>  | Methanol             |
| 4-Ethylphenol                      | C <sub>8</sub> H <sub>10</sub> O               | Methanol             |

| <b>metabolite</b>                  | <b>Molecular formula</b>                        | <b>Stock solvent</b>      |
|------------------------------------|-------------------------------------------------|---------------------------|
| 4-Vinylphenol                      | C <sub>8</sub> H <sub>8</sub> O                 | Methanol                  |
| Eugenol                            | C <sub>10</sub> H <sub>12</sub> O <sub>2</sub>  | Methanol                  |
| Methoxyeugenol                     | C <sub>11</sub> H <sub>14</sub> O <sub>3</sub>  | Methanol                  |
| Furfural                           | C <sub>5</sub> H <sub>4</sub> O <sub>2</sub>    | Methanol                  |
| 5-(Hydroxymethyl)furfural          | C <sub>6</sub> H <sub>6</sub> O <sub>3</sub>    | Methanol                  |
| 2,5-dimethyl-4-hydroxy-furanone    | C <sub>6</sub> H <sub>8</sub> O <sub>3</sub>    | Methanol                  |
| 2,5-dimethyl-4-methoxy-furanone    | C <sub>7</sub> H <sub>10</sub> O <sub>3</sub>   | Methanol                  |
| Tyrosol                            | C <sub>8</sub> H <sub>10</sub> O <sub>2</sub>   | Methanol                  |
| Hydroxytyrosol                     | C <sub>8</sub> H <sub>10</sub> O <sub>3</sub>   | Methanol                  |
| Oleuropein                         | C <sub>25</sub> H <sub>32</sub> O <sub>13</sub> | Methanol                  |
| Ellagic acid                       | C <sub>14</sub> H <sub>6</sub> O <sub>8</sub>   | 1 M Sodium hydroxide      |
| Catechin                           | C <sub>15</sub> H <sub>14</sub> O <sub>6</sub>  | Methanol                  |
| Epicatechin                        | C <sub>15</sub> H <sub>14</sub> O <sub>6</sub>  | Methanol                  |
| Epigallocatechin gallate           | C <sub>22</sub> H <sub>18</sub> O <sub>11</sub> | Methanol                  |
| Epicatechin gallate                | C <sub>22</sub> H <sub>18</sub> O <sub>10</sub> | Methanol                  |
| <i>Multi-metabolite solution B</i> |                                                 |                           |
| Methylgallate                      | C <sub>8</sub> H <sub>8</sub> O <sub>5</sub>    | Methanol                  |
| Ethylgallate                       | C <sub>9</sub> H <sub>10</sub> O <sub>5</sub>   | Methanol                  |
| 4-Methylcatechol                   | C <sub>7</sub> H <sub>8</sub> O <sub>2</sub>    | Methanol                  |
| trans-Resveratrol                  | C <sub>14</sub> H <sub>12</sub> O <sub>3</sub>  | Methanol/DMSO 75:25 (v:v) |
| trans-Resveratrol 3-O-glucoside    | C <sub>20</sub> H <sub>22</sub> O <sub>8</sub>  | Methanol/DMSO 75:25 (v:v) |
| Naringenin                         | C <sub>15</sub> H <sub>12</sub> O <sub>5</sub>  | Methanol/DMSO 75:25 (v:v) |
| Naringenin 7-O-neohesperidoside    | C <sub>27</sub> H <sub>32</sub> O <sub>14</sub> | Methanol/DMSO 75:25 (v:v) |
| Hesperetin                         | C <sub>16</sub> H <sub>14</sub> O <sub>6</sub>  | Methanol/DMSO 75:25 (v:v) |
| Hesperetin 7-O-rutinoside          | C <sub>28</sub> H <sub>34</sub> O <sub>15</sub> | Methanol/DMSO 75:25 (v:v) |

| <b>metabolite</b>                  | <b>Molecular formula</b>                        | <b>Stock solvent</b>      |
|------------------------------------|-------------------------------------------------|---------------------------|
| Quercetin                          | C <sub>15</sub> H <sub>10</sub> O <sub>7</sub>  | Methanol/DMSO 75:25 (v:v) |
| Quercetin 3-O-galactoside          | C <sub>21</sub> H <sub>20</sub> O <sub>12</sub> | Methanol/DMSO 75:25 (v:v) |
| Quercetin 3-O-glucoside            | C <sub>21</sub> H <sub>20</sub> O <sub>12</sub> | Methanol/DMSO 75:25 (v:v) |
| Quercetin 3-O-rutinoside           | C <sub>27</sub> H <sub>30</sub> O <sub>16</sub> | Methanol/DMSO 75:25 (v:v) |
| Quercetin 3-O-rhamnoside           | C <sub>21</sub> H <sub>20</sub> O <sub>11</sub> | Methanol/DMSO 75:25 (v:v) |
| Kaempferol                         | C <sub>15</sub> H <sub>10</sub> O <sub>6</sub>  | Methanol/DMSO 75:25 (v:v) |
| Kaempferol 3-glucoside             | C <sub>21</sub> H <sub>20</sub> O <sub>11</sub> | Methanol/DMSO 75:25 (v:v) |
| Isorhamnetin                       | C <sub>16</sub> H <sub>12</sub> O <sub>7</sub>  | Methanol/DMSO 75:25 (v:v) |
| Isorhamnetin 3-O-glucoside         | C <sub>22</sub> H <sub>22</sub> O <sub>12</sub> | Methanol/DMSO 75:25 (v:v) |
| Morin                              | C <sub>15</sub> H <sub>10</sub> O <sub>7</sub>  | Methanol/DMSO 75:25 (v:v) |
| Luteolin                           | C <sub>15</sub> H <sub>10</sub> O <sub>6</sub>  | Methanol/DMSO 75:25 (v:v) |
| Apigenin                           | C <sub>15</sub> H <sub>10</sub> O <sub>5</sub>  | Methanol/DMSO 75:25 (v:v) |
| <i>Multi-metabolite solution C</i> |                                                 |                           |
| Cyanidin                           | C <sub>15</sub> H <sub>11</sub> O <sub>6</sub>  | Methanol                  |
| Cyanidin 3-O-glucoside             | C <sub>21</sub> H <sub>21</sub> O <sub>11</sub> | Methanol                  |
| Malvidin                           | C <sub>17</sub> H <sub>15</sub> O <sub>7</sub>  | Methanol                  |
| Malvidin 3-O-glucoside             | C <sub>23</sub> H <sub>25</sub> O <sub>12</sub> | Methanol                  |
| Pelargonidin                       | C <sub>15</sub> H <sub>11</sub> O <sub>5</sub>  | Methanol                  |
| Pelargonidin 3-O-glucoside         | C <sub>21</sub> H <sub>21</sub> O <sub>10</sub> | Methanol                  |
| Peonidin                           | C <sub>16</sub> H <sub>13</sub> O <sub>6</sub>  | Methanol                  |
| Peonidin 3-O-glucoside             | C <sub>22</sub> H <sub>23</sub> O <sub>11</sub> | Methanol                  |
| Delphinidin 3-O-glucoside          | C <sub>21</sub> H <sub>21</sub> O <sub>12</sub> | Methanol                  |
| Petunidin 3-O-glucoside            | C <sub>22</sub> H <sub>23</sub> O <sub>12</sub> | Methanol                  |
| <i>Internal standards</i>          |                                                 |                           |
| 2,6-Dimethoxybenzoic acid          | C <sub>9</sub> H <sub>10</sub> O <sub>4</sub>   | Methanol                  |

| <b>metabolite</b> | <b>Molecular formula</b>                       | <b>Stock solvent</b> |
|-------------------|------------------------------------------------|----------------------|
| Bisphenol A       | C <sub>15</sub> H <sub>16</sub> O <sub>2</sub> | Methanol             |

Multi-metabolite solutions A and B are analyzed using the RP-UHPLC-DAD method that was optimized for non-anthocyanin compounds, multi-metabolite solution C is analyzed using the RP-UHPLC-DAD method that was optimized for anthocyanin compounds.

**Table S2.** Method validation parameters, retention times (RT), and maximum of absorbance for the 69 target phenolic compounds in the different matrices under study (S, solvent; OO, olive oil; RW, red wine; ST, strawberry). Limits of quantification are expressed as mg L<sup>-1</sup> for solvent solutions and red wine samples, and as mg kg<sup>-1</sup> for strawberry and olive oil samples.

| phenolic compound                     | matrix | $\lambda$<br>(nm) | RT (min) | linearity<br>(mg L <sup>-1</sup> ) | matrix<br>effect (%) | accuracy<br>(%) | LOQ<br>(mg<br>kg/L <sup>-1</sup> ) | intra-day<br>precision (%,<br>N = 5) | inter-day<br>precision (%,<br>N = 15) |
|---------------------------------------|--------|-------------------|----------|------------------------------------|----------------------|-----------------|------------------------------------|--------------------------------------|---------------------------------------|
| <i>Phenolic acids – Benzoic acids</i> |        |                   |          |                                    |                      |                 |                                    |                                      |                                       |
| Benzoic acid (BA)                     | S      | 280               | 9.83     | 0.1-100                            | -                    | 105.9           | 0.18                               | 0.1                                  | 7.6                                   |
|                                       | OO     |                   | 9.86     |                                    | 86.4                 | 89.8            | 0.20                               | 2.2                                  | 6.1                                   |
|                                       | RW     |                   | 9.80     |                                    | 82.9                 | 114.2           | 0.21                               | 2.2                                  | 4.1                                   |
|                                       | ST     |                   | 9.82     |                                    | 78.9                 | 85.6            | 0.21                               | 1.9                                  | 9.0                                   |
| 4-Hydroxybenzoic acid<br>(4-HBA)      | S      | 260               | 3.67     | 0.05-100                           | -                    | 92.7            | 0.052                              | 2.4                                  | 6.6                                   |
|                                       | OO     |                   | 3.68     |                                    | 96.8                 | 104.2           | 0.053                              | 1.6                                  | 5.5                                   |
|                                       | RW     |                   | 3.67     |                                    | 94.8                 | 107.2           | 0.054                              | 3.5                                  | 3.4                                   |
|                                       | ST     |                   | 3.64     |                                    | 99.4                 | 102.0           | 0.052                              | 1.1                                  | 7.5                                   |
|                                       | S      | 260               | 2.10     | 0.05-100                           | -                    | 98.0            | 0.053                              | 2.4                                  | 6.9                                   |

| phenolic compound                       | matrix | $\lambda$<br>(nm) | RT (min) | linearity<br>(mg L <sup>-1</sup> ) | matrix<br>effect (%) | accuracy<br>(%) | LOQ<br>(mg<br>kg/L <sup>-1</sup> ) | intra-day<br>precision (%,<br>N = 5) | inter-day<br>precision (%,<br>N = 15) |
|-----------------------------------------|--------|-------------------|----------|------------------------------------|----------------------|-----------------|------------------------------------|--------------------------------------|---------------------------------------|
| 3,4-Dihydroxybenzoic<br>acid (3,4-DHBA) | OO     |                   | 2.11     |                                    | 116.0                | 94.2            | 0.050                              | 0.9                                  | 6.5                                   |
|                                         | RW     |                   | 2.08     |                                    | 95.9                 | 92.7            | 0.055                              | 3.0                                  | 3.3                                   |
|                                         | ST     |                   | 2.10     |                                    | 85.0                 | 84.0            | 0.059                              | 0.9                                  | 8.0                                   |
| Vanillic acid (VA)                      | S      | 260               | 7.01     | 0.05-100                           | -                    | 93.6            | 0.077                              | 0.3                                  | 6.0                                   |
|                                         | OO     |                   | 7.02     |                                    | 94.5                 | 104.5           | 0.080                              | 0.2                                  | 5.9                                   |
|                                         | RW     |                   | 7.02     |                                    | 85.8                 | 88.9            | 0.084                              | 6.0                                  | 6.8                                   |
|                                         | ST     |                   | 7.03     |                                    | 91.9                 | 102.7           | 0.082                              | 3.2                                  | 11.7                                  |
| Gallic acid (GA)                        | S      | 280               | 1.18     | 0.05-100                           | -                    | 98.5            | 0.072                              | 0.8                                  | 5.7                                   |
|                                         | OO     |                   | 1.19     |                                    | 77.6                 | 69.4            | 0.091                              | 2.6                                  | 5.8                                   |
|                                         | RW     |                   | 1.16     |                                    | 75.0                 | 63.4            | 0.096                              | 1.6                                  | 1.6                                   |
|                                         | ST     |                   | 1.18     |                                    | 63.9                 | 64.4            | 0.11                               | 0.3                                  | 7.6                                   |
| Methylgallate (MeGA)                    | S      | 280               | 5.09     | 0.01-100                           | -                    | 98.0            | 0.015                              | 6.2                                  | 5.8                                   |
|                                         | OO     |                   | 5.12     |                                    | 98.1                 | 97.2            | 0.015                              | 2.8                                  | 6.7                                   |

| phenolic compound              | matrix | $\lambda$<br>(nm) | RT (min) | linearity<br>(mg L <sup>-1</sup> ) | matrix<br>effect (%) | accuracy<br>(%) | LOQ<br>(mg<br>kg/L <sup>-1</sup> ) | intra-day<br>precision (%,<br>N = 5) | inter-day<br>precision (%,<br>N = 15) |
|--------------------------------|--------|-------------------|----------|------------------------------------|----------------------|-----------------|------------------------------------|--------------------------------------|---------------------------------------|
|                                | RW     |                   | 5.11     |                                    | 91.6                 | 115.5           | 0.016                              | 6.7                                  | 5.6                                   |
|                                | ST     |                   | 5.12     |                                    | 105.6                | 106.7           | 0.014                              | 6.2                                  | 10.7                                  |
| Ethylgallate (EtGA)            | S      | 280               | 10.67    | 0.01-100                           | -                    | 99.2            | 0.022                              | 0.3                                  | 6.0                                   |
|                                | OO     |                   | 10.67    |                                    | 102.5                | 115.0           | 0.021                              | 0.2                                  | 3.2                                   |
|                                | RW     |                   | 10.69    |                                    | 113.5                | 96.1            | 0.020                              | 2.3                                  | 2.8                                   |
|                                | ST     |                   | 10.67    |                                    | 101.0                | 107.8           | 0.021                              | 1.9                                  | 5.6                                   |
| 4-O-Methylgallic acid (4-MeGA) | S      | 260               | 16.03    | 0.05-100                           | -                    | 92.9            | 0.057                              | 0.3                                  | 6.8                                   |
|                                | OO     |                   | 16.05    |                                    | 95.3                 | 100.9           | 0.059                              | 0.5                                  | 5.5                                   |
|                                | RW     |                   | 16.05    |                                    | 91.5                 | 116.0           | 0.061                              | 2.7                                  | 5.0                                   |
|                                | ST     |                   | 15.99    |                                    | 94.0                 | 102.3           | 0.060                              | 1.0                                  | 8.4                                   |
| Syringic acid (SYR)            | S      | 280               | 10.14    | 0.05-100                           | -                    | 92.5            | 0.055                              | 0.2                                  | 5.9                                   |
|                                | OO     |                   | 10.15    |                                    | 93.8                 | 100.5           | 0.057                              | 0.4                                  | 5.7                                   |
|                                | RW     |                   | 10.17    |                                    | 97.7                 | 102.3           | 0.055                              | 1.7                                  | 3.0                                   |



| phenolic compound                                 | matrix | $\lambda$<br>(nm) | RT (min) | linearity<br>(mg L <sup>-1</sup> ) | matrix<br>effect (%) | accuracy<br>(%) | LOQ<br>(mg<br>kg/L <sup>-1</sup> ) | intra-day<br>precision (%,<br>N = 5) | inter-day<br>precision (%,<br>N = 15) |
|---------------------------------------------------|--------|-------------------|----------|------------------------------------|----------------------|-----------------|------------------------------------|--------------------------------------|---------------------------------------|
|                                                   | ST     |                   | 10.16    |                                    | 96.5                 | 113.0           | 0.056                              | 2.3                                  | 6.5                                   |
| <i>Phenolic acids – Phenylacetic acids</i>        |        |                   |          |                                    |                      |                 |                                    |                                      |                                       |
| 4-Hydroxyphenylacetic<br>acid (4-HPAA)            | S      | 280               | 4.82     | 0.01-100                           | -                    | 106.4           | 0.025                              | 3.2                                  | 8.5                                   |
|                                                   | OO     |                   | 4.80     |                                    | 74.2                 | 68.3            | 0.031                              | 5.9                                  | 8.2                                   |
|                                                   | RW     |                   | 4.80     |                                    | 94.3                 | 87.9            | 0.026                              | 7.0                                  | 8.3                                   |
|                                                   | ST     |                   | 4.81     |                                    | 79.9                 | 80.9            | 0.031                              | 4.5                                  | 8.6                                   |
| 3,4-<br>Dihydroxyphenylacetic<br>acid (3,4-DHPAA) | S      | 280               | 2.59     | 0.01-100                           | -                    | 96.3            | 0.028                              | 0.5                                  | 4.1                                   |
|                                                   | OO     |                   | 2.61     |                                    | 85.4                 | 82.4            | 0.033                              | 4.8                                  | 7.5                                   |
|                                                   | RW     |                   | 2.57     |                                    | 105.7                | 108.6           | 0.027                              | 5.8                                  | 9.6                                   |
|                                                   | ST     |                   | 2.59     |                                    | 65.7                 | 75.6            | 0.039                              | 2.5                                  | 7.2                                   |
| <i>Phenolic acids – Cinnamic acids</i>            |        |                   |          |                                    |                      |                 |                                    |                                      |                                       |
| trans-Cinnamic acid (tCA)                         | S      | 280               | 18.54    | 0.05-100                           | -                    | 93.3            | 0.051                              | 0.4                                  | 6.0                                   |
|                                                   | OO     |                   | 18.57    |                                    | 99.2                 | 103.5           | 0.051                              | 1.1                                  | 5.9                                   |

| phenolic compound         | matrix | $\lambda$<br>(nm) | RT (min) | linearity<br>(mg L <sup>-1</sup> ) | matrix<br>effect (%) | accuracy<br>(%) | LOQ<br>(mg<br>kg/L <sup>-1</sup> ) | intra-day<br>precision (%,<br>N = 5) | inter-day<br>precision (%,<br>N = 15) |
|---------------------------|--------|-------------------|----------|------------------------------------|----------------------|-----------------|------------------------------------|--------------------------------------|---------------------------------------|
|                           | RW     |                   | 18.59    |                                    | 99.3                 | 110.6           | 0.051                              | 1.9                                  | 1.9                                   |
|                           | ST     |                   | 18.57    |                                    | 90.3                 | 98.7            | 0.053                              | 0.6                                  | 8.9                                   |
| o-Coumaric acid (oCOU)    | S      | 280               | 14.40    | 0.05-100                           | -                    | 93.0            | 0.064                              | 0.3                                  | 5.9                                   |
|                           | OO     |                   | 14.44    |                                    | 94.5                 | 103.0           | 0.066                              | 0.7                                  | 5.6                                   |
|                           | RW     |                   | 14.45    |                                    | 99.4                 | 102.5           | 0.064                              | 3.3                                  | 3.9                                   |
|                           | ST     |                   | 14.45    |                                    | 86.4                 | 115.5           | 0.073                              | 2.0                                  | 7.4                                   |
| m-Coumaric acid<br>(mCOU) | S      | 280               | 12.76    | 0.05-100                           | -                    | 92.8            | 0.047                              | 0.3                                  | 6.0                                   |
|                           | OO     |                   | 12.79    |                                    | 94.5                 | 103.0           | 0.048                              | 0.5                                  | 5.8                                   |
|                           | RW     |                   | 12.81    |                                    | 93.9                 | 110.6           | 0.049                              | 2.2                                  | 2.2                                   |
|                           | ST     |                   | 12.78    |                                    | 89.7                 | 113.9           | 0.051                              | 0.4                                  | 6.6                                   |
| p-Coumaric acid (pCOU)    | S      | 320               | 11.05    | 0.05-100                           | -                    | 92.6            | 0.053                              | 0.3                                  | 5.9                                   |
|                           | OO     |                   | 11.07    |                                    | 93.9                 | 102.1           | 0.056                              | 0.1                                  | 5.5                                   |
|                           | RW     |                   | 11.09    |                                    | 94.3                 | 102.0           | 0.056                              | 2.5                                  | 2.8                                   |

| phenolic compound             | matrix | $\lambda$<br>(nm) | RT (min) | linearity<br>(mg L <sup>-1</sup> ) | matrix<br>effect (%) | accuracy<br>(%) | LOQ<br>(mg<br>kg/L <sup>-1</sup> ) | intra-day<br>precision (%,<br>N = 5) | inter-day<br>precision (%,<br>N = 15) |
|-------------------------------|--------|-------------------|----------|------------------------------------|----------------------|-----------------|------------------------------------|--------------------------------------|---------------------------------------|
|                               | ST     |                   | 11.06    |                                    | 89.7                 | 99.9            | 0.058                              | 0.2                                  | 7.5                                   |
| Caffeic acid (CA)             | S      | 320               | 7.90     | 0.01-100                           | -                    | 93.0            | 0.038                              | 1.0                                  | 6.0                                   |
|                               | OO     |                   | 7.92     |                                    | 97.4                 | 106.4           | 0.039                              | 2.5                                  | 5.8                                   |
|                               | RW     |                   | 7.94     |                                    | 95.6                 | 92.0            | 0.039                              | 2.7                                  | 2.9                                   |
|                               | ST     |                   | 7.93     |                                    | 96.3                 | 111.7           | 0.039                              | 2.0                                  | 7.1                                   |
| Ferulic acid (FA)             | S      | 320               | 13.98    | 0.05-100                           | -                    | 93.0            | 0.054                              | 0.3                                  | 6.4                                   |
|                               | OO     |                   | 13.97    |                                    | 95.0                 | 101.8           | 0.057                              | 0.8                                  | 5.5                                   |
|                               | RW     |                   | 13.99    |                                    | 95.8                 | 102.7           | 0.056                              | 1.0                                  | 2.4                                   |
|                               | ST     |                   | 13.96    |                                    | 90.8                 | 101.5           | 0.058                              | 0.4                                  | 8.1                                   |
| 3-Caffeoylquinic acid (3-CQA) | S      | 320               | 10.63    | 0.05-100                           | -                    | 91.3            | 0.048                              | 0.3                                  | 5.3                                   |
|                               | OO     |                   | 10.65    |                                    | 94.5                 | 98.0            | 0.050                              | 0.2                                  | 4.8                                   |
|                               | RW     |                   | 10.68    |                                    | 91.6                 | 95.5            | 0.051                              | 2.7                                  | 2.6                                   |
|                               | ST     |                   | 10.66    |                                    | 95.6                 | 99.8            | 0.050                              | 1.3                                  | 5.1                                   |

| phenolic compound                             | matrix | $\lambda$<br>(nm) | RT (min) | linearity<br>(mg L <sup>-1</sup> ) | matrix<br>effect (%) | accuracy<br>(%) | LOQ<br>(mg<br>kg/L <sup>-1</sup> ) | intra-day<br>precision (%,<br>N = 5) | inter-day<br>precision (%,<br>N = 15) |
|-----------------------------------------------|--------|-------------------|----------|------------------------------------|----------------------|-----------------|------------------------------------|--------------------------------------|---------------------------------------|
| Sinapic acid (SIN)                            | S      | 320               | 15.73    | 0.05-100                           | -                    | 93.3            | 0.049                              | 0.4                                  | 3.0                                   |
|                                               | OO     |                   | 15.75    |                                    | 101.6                | 100.9           | 0.049                              | 1.6                                  | 3.8                                   |
|                                               | RW     |                   | 15.76    |                                    | 105.3                | 92.8            | 0.048                              | 6.0                                  | 10.5                                  |
|                                               | ST     |                   | 15.74    |                                    | 110.5                | 112.5           | 0.047                              | 3.9                                  | 10.2                                  |
| <i>Phenolic acids – Phenylpropionic acids</i> |        |                   |          |                                    |                      |                 |                                    |                                      |                                       |
| 3-(4-Hydroxyphenyl)propionic acid (4-HPPA)    | S      | 280               | 8.72     | 0.05-100                           | -                    | 112.1           | 0.050                              | 4.8                                  | 10.9                                  |
|                                               | OO     |                   | 8.70     |                                    | 80.2                 | 77.2            | 0.062                              | 5.2                                  | 11.6                                  |
|                                               | RW     |                   | 8.75     |                                    | 88.7                 | 91.9            | 0.057                              | 5.3                                  | 6.3                                   |
|                                               | ST     |                   | 8.75     |                                    | 81.3                 | 79.8            | 0.060                              | 1.7                                  | 11.1                                  |
| <i>Benzaldehydes</i>                          |        |                   |          |                                    |                      |                 |                                    |                                      |                                       |
| 4-Hydroxybenzaldehyde (4-HBAld)               | S      | 280               | 5.06     | 0.05-100                           | -                    | 93.5            | 0.046                              | 1.2                                  | 6.1                                   |
|                                               | OO     |                   | 5.06     |                                    | 95.5                 | 102.8           | 0.046                              | 1.2                                  | 5.5                                   |
|                                               | RW     |                   | 5.07     |                                    | 93.5                 | 100.4           | 0.047                              | 2.5                                  | 4.2                                   |

| phenolic compound                             | matrix | $\lambda$<br>(nm) | RT (min) | linearity<br>(mg L <sup>-1</sup> ) | matrix<br>effect (%) | accuracy<br>(%) | LOQ<br>(mg<br>kg/L <sup>-1</sup> ) | intra-day<br>precision (%,<br>N = 5) | inter-day<br>precision (%,<br>N = 15) |
|-----------------------------------------------|--------|-------------------|----------|------------------------------------|----------------------|-----------------|------------------------------------|--------------------------------------|---------------------------------------|
|                                               | ST     |                   | 5.06     |                                    | 94.4                 | 108.3           | 0.048                              | 1.5                                  | 7.3                                   |
| 3,4-<br>Dihydroxybenzaldehyde<br>(3,4-DHBAld) | S      | 280               | 3.15     | 0.05-100                           | -                    | 93.2            | 0.062                              | 2.9                                  | 6.6                                   |
|                                               | OO     |                   | 3.16     |                                    | 107.6                | 104.6           | 0.059                              | 4.5                                  | 5.7                                   |
|                                               | RW     |                   | 3.13     |                                    | 101.0                | 111.6           | 0.061                              | 3.2                                  | 4.2                                   |
|                                               | ST     |                   | 3.15     |                                    | 63.1                 | 73.2            | 0.085                              | 0.7                                  | 6.1                                   |
| Vanillin (VAN)                                | S      | 280               | 8.93     | 0.05-100                           | -                    | 91.2            | 0.059                              | 2.2                                  | 3.6                                   |
|                                               | OO     |                   | 8.93     |                                    | 106.2                | 98.5            | 0.056                              | 0.9                                  | 3.9                                   |
|                                               | RW     |                   | 8.98     |                                    | 104.5                | 103.1           | 0.056                              | 3.9                                  | 7.1                                   |
|                                               | ST     |                   | 8.90     |                                    | 96.3                 | 96.2            | 0.060                              | 0.9                                  | 3.8                                   |
| Syringaldehyde (SYRAld)                       | S      | 280               | 11.99    | 0.05-100                           | -                    | 92.3            | 0.044                              | 0.3                                  | 5.9                                   |
|                                               | OO     |                   | 11.99    |                                    | 94.7                 | 104.3           | 0.045                              | 0.4                                  | 7.1                                   |
|                                               | RW     |                   | 12.02    |                                    | 95.1                 | 110.7           | 0.045                              | 3.8                                  | 4.4                                   |
|                                               | ST     |                   | 11.99    |                                    | 88.8                 | 101.4           | 0.048                              | 4.5                                  | 9.6                                   |

| phenolic compound          | matrix | $\lambda$<br>(nm) | RT (min) | linearity<br>(mg L <sup>-1</sup> ) | matrix<br>effect (%) | accuracy<br>(%) | LOQ<br>(mg<br>kg/L <sup>-1</sup> ) | intra-day<br>precision (%,<br>N = 5) | inter-day<br>precision (%,<br>N = 15) |
|----------------------------|--------|-------------------|----------|------------------------------------|----------------------|-----------------|------------------------------------|--------------------------------------|---------------------------------------|
| <i>Phenols</i>             |        |                   |          |                                    |                      |                 |                                    |                                      |                                       |
| 4-Methylcatechol (4-MeCAT) | S      | 280               | 4.89     | 0.05-100                           | -                    | 95.7            | 0.067                              | 3.4                                  | 10.0                                  |
|                            | OO     |                   | 4.91     |                                    | 96.8                 | 101.3           | 0.068                              | 2.8                                  | 5.5                                   |
|                            | RW     |                   | 4.92     |                                    | 100.5                | 106.3           | 0.067                              | 6.1                                  | 5.1                                   |
|                            | ST     |                   | 4.88     |                                    | 93.4                 | 98.4            | 0.069                              | 2.7                                  | 5.9                                   |
| 4-Ethylphenol (4-EtPh)     | S      | 280               | 17.54    | 0.1-100                            | -                    | 104.2           | 0.13                               | 4.7                                  | 9.8                                   |
|                            | OO     |                   | 17.54    |                                    | 90.8                 | 109.4           | 0.14                               | 8.1                                  | 13.5                                  |
|                            | RW     |                   | 17.56    |                                    | 95.8                 | 86.1            | 0.14                               | 7.1                                  | 11.2                                  |
|                            | ST     |                   | 17.54    |                                    | 105.9                | 106.8           | 0.13                               | 7.1                                  | 11.8                                  |
| 4-Vinylphenol (4-VPh)      | S      | 260               | 14.83    | 0.1-100                            | -                    | 92.4            | 0.18                               | 0.5                                  | 5.1                                   |
|                            | OO     |                   | 14.86    |                                    | 88.2                 | 92.8            | 0.20                               | 3.4                                  | 6.0                                   |
|                            | RW     |                   | 14.86    |                                    | 102.6                | 87.0            | 0.18                               | 3.4                                  | 7.8                                   |
|                            | ST     |                   | 14.83    |                                    | 81.0                 | 97.2            | 0.21                               | 0.9                                  | 5.4                                   |

| phenolic compound        | matrix | $\lambda$<br>(nm) | RT (min) | linearity<br>(mg L <sup>-1</sup> ) | matrix<br>effect (%) | accuracy<br>(%) | LOQ<br>(mg<br>kg/L <sup>-1</sup> ) | intra-day<br>precision (%,<br>N = 5) | inter-day<br>precision (%,<br>N = 15) |
|--------------------------|--------|-------------------|----------|------------------------------------|----------------------|-----------------|------------------------------------|--------------------------------------|---------------------------------------|
| Eugenol (EU)             | S      | 280               | 22.89    | 0.1-100                            | -                    | 90.5            | 0.11                               | 1.8                                  | 7.1                                   |
|                          | OO     |                   | 22.91    |                                    | 95.2                 | 111.1           | 0.11                               | 2.9                                  | 6.9                                   |
|                          | RW     |                   | 22.94    |                                    | 89.4                 | 100.3           | 0.12                               | 5.2                                  | 7.9                                   |
|                          | ST     |                   | 22.92    |                                    | 87.1                 | 100.3           | 0.12                               | 2.8                                  | 8.5                                   |
| Methoxyeugenol (MeEU)    | S      | 280               | 23.83    | 0.1-100                            | -                    | 97.6            | 0.33                               | 2.8                                  | 6.5                                   |
|                          | OO     |                   | 23.84    |                                    | 90.2                 | 108.6           | 0.36                               | 6.2                                  | 7.9                                   |
|                          | RW     |                   | 23.86    |                                    | 83.7                 | 96.9            | 0.38                               | 6.2                                  | 8.7                                   |
|                          | ST     |                   | 23.85    |                                    | 90.8                 | 98.1            | 0.37                               | 9.4                                  | 10.3                                  |
| <i>Furan derivatives</i> |        |                   |          |                                    |                      |                 |                                    |                                      |                                       |
| Furfural (F)             | S      | 280               | 1.79     | 0.05-100                           | -                    | 92.1            | 0.059                              | 0.1                                  | 12.0                                  |
|                          | OO     |                   | 1.75     |                                    | 106.4                | 97.2            | 0.056                              | 1.9                                  | 11.1                                  |
|                          | RW     |                   | 1.78     |                                    | 116.5                | 111.0           | 0.053                              | 1.4                                  | 12.9                                  |
|                          | ST     |                   | 1.75     |                                    | 103.5                | 103.3           | 0.057                              | 1.0                                  | 8.6                                   |

| phenolic compound                          | matrix | $\lambda$<br>(nm) | RT (min) | linearity<br>(mg L <sup>-1</sup> ) | matrix<br>effect (%) | accuracy<br>(%) | LOQ<br>(mg<br>kg/L <sup>-1</sup> ) | intra-day<br>precision (%,<br>N = 5) | inter-day<br>precision (%,<br>N = 15) |
|--------------------------------------------|--------|-------------------|----------|------------------------------------|----------------------|-----------------|------------------------------------|--------------------------------------|---------------------------------------|
| 5-(Hydroxymethyl)furfural<br>(5-HMF)       | S      | 280               | 1.51     | 0.05-100                           | -                    | 98.7            | 0.066                              | 1.0                                  | 5.1                                   |
|                                            | OO     |                   | 1.51     |                                    | 70.4                 | 64.2            | 0.093                              | 1.8                                  | 5.3                                   |
|                                            | RW     |                   | 1.48     |                                    | 103.7                | 102.6           | 0.066                              | 1.7                                  | 2.4                                   |
|                                            | ST     |                   | 1.50     |                                    | 63.8                 | 72.2            | 0.098                              | 1.9                                  | 6.9                                   |
| 2,5-dimethyl-4-hydroxy-<br>furanone (DMHF) | S      | 280               | 2.33     | 0.05-100                           | -                    | 97.5            | 0.048                              | 0.4                                  | 8.7                                   |
|                                            | OO     |                   | 2.35     |                                    | 95.0                 | 82.6            | 0.050                              | 3.7                                  | 7.5                                   |
|                                            | RW     |                   | 2.38     |                                    | 117.3                | 116.8           | 0.043                              | 2.2                                  | 4.4                                   |
|                                            | ST     |                   | 2.32     |                                    | 88.2                 | 116.7           | 0.053                              | 4.5                                  | 10.2                                  |
| 2,5-dimethyl-4-methoxy-<br>furanone (DMMF) | S      | 280               | 6.68     | 0.01-100                           | -                    | 96.0            | 0.030                              | 0.2                                  | 1.9                                   |
|                                            | OO     |                   | 6.69     |                                    | 96.0                 | 95.6            | 0.030                              | 0.5                                  | 2.1                                   |
|                                            | RW     |                   | 6.70     |                                    | 90.4                 | 91.0            | 0.033                              | 2.6                                  | 5.2                                   |
|                                            | ST     |                   | 6.71     |                                    | 88.3                 | 92.9            | 0.033                              | 1.5                                  | 4.1                                   |
| <i>Phenylethanoids</i>                     |        |                   |          |                                    |                      |                 |                                    |                                      |                                       |



| phenolic compound     | matrix | $\lambda$<br>(nm) | RT (min) | linearity<br>(mg L <sup>-1</sup> ) | matrix<br>effect (%) | accuracy<br>(%) | LOQ<br>(mg<br>kg/L <sup>-1</sup> ) | intra-day<br>precision (%,<br>N = 5) | inter-day<br>precision (%,<br>N = 15) |
|-----------------------|--------|-------------------|----------|------------------------------------|----------------------|-----------------|------------------------------------|--------------------------------------|---------------------------------------|
| Tyrosol (TYR)         | S      | 280               | 3.87     | 0.1-100                            | -                    | 87.6            | 0.085                              | 2.5                                  | 11.3                                  |
|                       | OO     |                   | 3.87     |                                    | 89.4                 | 90.5            | 0.094                              | 3.4                                  | 9.2                                   |
|                       | RW     |                   | 3.84     |                                    | 92.6                 | 102.3           | 0.092                              | 2.9                                  | 4.9                                   |
|                       | ST     |                   | 3.90     |                                    | 91.8                 | 92.4            | 0.092                              | 4.9                                  | 10.2                                  |
| Hydroxytyrosol (HTYR) | S      | 280               | 2.14     | 0.05-100                           | -                    | 89.3            | 0.063                              | 0.2                                  | 10.8                                  |
|                       | OO     |                   | 2.14     |                                    | 102.5                | 90.3            | 0.061                              | 3.7                                  | 6.9                                   |
|                       | RW     |                   | 2.09     |                                    | 102.1                | 109.8           | 0.061                              | 3.4                                  | 4.7                                   |
|                       | ST     |                   | 2.13     |                                    | 97.5                 | 89.7            | 0.063                              | 5.9                                  | 10.5                                  |
| Oleuropein (OLE)      | S      | 280               | 21.46    | 0.1-100                            | -                    | 91.4            | 0.13                               | 0.1                                  | 6.5                                   |
|                       | OO     |                   | 21.45    |                                    | 110.2                | 109.5           | 0.13                               | 4.6                                  | 8.0                                   |
|                       | RW     |                   | 21.43    |                                    | 90.9                 | 110.1           | 0.14                               | 9.6                                  | 10.3                                  |
|                       | ST     |                   | 21.48    |                                    | 95.2                 | 115.2           | 0.13                               | 7.5                                  | 9.8                                   |
| <i>Tannins</i>        |        |                   |          |                                    |                      |                 |                                    |                                      |                                       |

| phenolic compound                               | matrix | $\lambda$<br>(nm) | RT (min) | linearity<br>(mg L <sup>-1</sup> ) | matrix<br>effect (%) | accuracy<br>(%) | LOQ<br>(mg<br>kg/L <sup>-1</sup> ) | intra-day<br>precision (%,<br>N = 5) | inter-day<br>precision (%,<br>N = 15) |
|-------------------------------------------------|--------|-------------------|----------|------------------------------------|----------------------|-----------------|------------------------------------|--------------------------------------|---------------------------------------|
| Ellagic acid (EA)                               | S      | 260               | 18.90    | 0.5-100                            | -                    | 97.9            | 0.60                               | 0.9                                  | 8.8                                   |
|                                                 | OO     |                   | 18.90    |                                    | 109.2                | 85.2            | 0.55                               | 0.7                                  | 5.3                                   |
|                                                 | RW     |                   | 18.90    |                                    | 79.9                 | 83.6            | 0.65                               | 3.7                                  | 4.1                                   |
|                                                 | ST     |                   | 18.88    |                                    | 105.4                | 87.1            | 0.57                               | 0.5                                  | 5.6                                   |
| <i>Stilbenes</i>                                |        |                   |          |                                    |                      |                 |                                    |                                      |                                       |
| trans-Resveratrol (tRSV)                        | S      | 320               | 20.23    | 0.01-100                           | -                    | 96.9            | 0.021                              | 0.1                                  | 6.2                                   |
|                                                 | OO     |                   | 20.26    |                                    | 101.0                | 107.8           | 0.021                              | 0.1                                  | 6.3                                   |
|                                                 | RW     |                   | 20.28    |                                    | 107.6                | 110.9           | 0.020                              | 4.7                                  | 4.4                                   |
|                                                 | ST     |                   | 20.25    |                                    | 113.6                | 116.9           | 0.020                              | 0.6                                  | 7.0                                   |
| trans-Resveratrol 3-O-<br>glucoside (tRSV-3GLC) | S      | 320               | 17.28    | 0.01-100                           | -                    | 97.0            | 0.0069                             | 0.3                                  | 6.6                                   |
|                                                 | OO     |                   | 17.28    |                                    | 83.5                 | 109.3           | 0.0082                             | 0.3                                  | 7.1                                   |
|                                                 | RW     |                   | 17.31    |                                    | 88.3                 | 109.7           | 0.0075                             | 3.9                                  | 3.6                                   |
|                                                 | ST     |                   | 17.29    |                                    | 94.2                 | 105.6           | 0.0070                             | 3.7                                  | 8.8                                   |

| phenolic compound                  | matrix | $\lambda$<br>(nm) | RT (min) | linearity<br>(mg L <sup>-1</sup> ) | matrix<br>effect (%) | accuracy<br>(%) | LOQ<br>(mg<br>kg/L <sup>-1</sup> ) | intra-day<br>precision (%,<br>N = 5) | inter-day<br>precision (%,<br>N = 15) |
|------------------------------------|--------|-------------------|----------|------------------------------------|----------------------|-----------------|------------------------------------|--------------------------------------|---------------------------------------|
| <i>Flavonoids – Flavan-3-ols</i>   |        |                   |          |                                    |                      |                 |                                    |                                      |                                       |
| Catechin (C)                       | S      | 280               | 8.40     | 0.1-100                            | -                    | 107.5           | 0.11                               | 0.7                                  | 11.6                                  |
|                                    | OO     |                   | 8.45     |                                    | 77.0                 | 72.5            | 0.14                               | 3.0                                  | 10.4                                  |
|                                    | RW     |                   | 8.44     |                                    | 96.4                 | 99.8            | 0.11                               | 2.7                                  | 3.3                                   |
|                                    | ST     |                   | 8.44     |                                    | 71.0                 | 65.6            | 0.14                               | 0.3                                  | 10.7                                  |
| Epicatechin (EC)                   | S      | 280               | 12.44    | 0.1-100                            | -                    | 93.0            | 0.11                               | 0.2                                  | 3.6                                   |
|                                    | OO     |                   | 12.47    |                                    | 97.5                 | 101.9           | 0.11                               | 1.7                                  | 4.0                                   |
|                                    | RW     |                   | 12.47    |                                    | 94.5                 | 102.2           | 0.11                               | 7.1                                  | 5.9                                   |
|                                    | ST     |                   | 12.46    |                                    | 80.3                 | 82.5            | 0.12                               | 0.3                                  | 4.9                                   |
| Epigallocatechin gallate<br>(EGCG) | S      | 280               | 13.70    | 0.05-100                           | -                    | 101.4           | 0.066                              | 0.3                                  | 8.9                                   |
|                                    | OO     |                   | 13.73    |                                    | 111.3                | 85.6            | 0.064                              | 5.3                                  | 7.9                                   |
|                                    | RW     |                   | 13.74    |                                    | 119.5                | 99.8            | 0.064                              | 3.9                                  | 8.2                                   |
|                                    | ST     |                   | 13.73    |                                    | 117.8                | 103.4           | 0.065                              | 1.2                                  | 6.8                                   |

| phenolic compound                                  | matrix | $\lambda$<br>(nm) | RT (min) | linearity<br>(mg L <sup>-1</sup> ) | matrix<br>effect (%) | accuracy<br>(%) | LOQ<br>(mg<br>kg/L <sup>-1</sup> ) | intra-day<br>precision (%,<br>N = 5) | inter-day<br>precision (%,<br>N = 15) |
|----------------------------------------------------|--------|-------------------|----------|------------------------------------|----------------------|-----------------|------------------------------------|--------------------------------------|---------------------------------------|
| Epicatechin gallate<br>(ECG)                       | S      | 280               | 17.35    | 0.1-100                            | -                    | 93.5            | 0.11                               | 2.1                                  | 6.8                                   |
|                                                    | OO     |                   | 17.37    |                                    | 98.6                 | 100.9           | 0.11                               | 4.4                                  | 8.4                                   |
|                                                    | RW     |                   | 17.37    |                                    | 100.0                | 82.2            | 0.11                               | 4.4                                  | 6.9                                   |
|                                                    | ST     |                   | 17.35    |                                    | 97.5                 | 82.3            | 0.11                               | 3.3                                  | 10.6                                  |
| <i>Flavonoids – Flavanones</i>                     |        |                   |          |                                    |                      |                 |                                    |                                      |                                       |
| Naringenin (NAR)                                   | S      | 280               | 24.89    | 0.01-100                           | -                    | 98.3            | 0.039                              | 1.2                                  | 6.3                                   |
|                                                    | OO     |                   | 24.92    |                                    | 109.4                | 109.4           | 0.035                              | 1.3                                  | 6.7                                   |
|                                                    | RW     |                   | 24.87    |                                    | 111.1                | 115.9           | 0.035                              | 7.8                                  | 6.9                                   |
|                                                    | ST     |                   | 24.93    |                                    | 116.8                | 118.4           | 0.034                              | 0.3                                  | 6.5                                   |
| Naringenin 7-O-<br>neohesperidoside (NAR-<br>7NEO) | S      | 280               | 19.95    | 0.05-100                           | -                    | 99.3            | 0.050                              | 1.0                                  | 6.7                                   |
|                                                    | OO     |                   | 19.97    |                                    | 104.7                | 108.1           | 0.048                              | 1.0                                  | 5.3                                   |
|                                                    | RW     |                   | 19.98    |                                    | 104.9                | 105.7           | 0.049                              | 3.9                                  | 8.8                                   |
|                                                    | ST     |                   | 19.99    |                                    | 108.6                | 108.0           | 0.048                              | 1.1                                  | 11.3                                  |

| phenolic compound                       | matrix | $\lambda$<br>(nm) | RT (min) | linearity<br>(mg L <sup>-1</sup> ) | matrix<br>effect (%) | accuracy<br>(%) | LOQ<br>(mg<br>kg/L <sup>-1</sup> ) | intra-day<br>precision (%,<br>N = 5) | inter-day<br>precision (%,<br>N = 15) |
|-----------------------------------------|--------|-------------------|----------|------------------------------------|----------------------|-----------------|------------------------------------|--------------------------------------|---------------------------------------|
| Hesperetin (HES)                        | S      | 280               | 27.21    | 0.05-100                           | -                    | 96.4            | 0.065                              | 0.3                                  | 8.0                                   |
|                                         | OO     |                   | 27.23    |                                    | 85.2                 | 111.4           | 0.072                              | 0.9                                  | 7.8                                   |
|                                         | RW     |                   | 27.26    |                                    | 98.1                 | 117.4           | 0.066                              | 8.8                                  | 7.4                                   |
|                                         | ST     |                   | 27.24    |                                    | 96.4                 | 118.9           | 0.070                              | 0.1                                  | 7.4                                   |
| Hesperetin 7-O-rutinoside<br>(HES-7RUT) | S      | 280               | 20.45    | 0.05-100                           | -                    | 98.3            | 0.056                              | 2.3                                  | 6.0                                   |
|                                         | OO     |                   | 20.46    |                                    | 102.1                | 108.9           | 0.055                              | 3.9                                  | 7.1                                   |
|                                         | RW     |                   | 20.48    |                                    | 98.8                 | 103.9           | 0.055                              | 5.0                                  | 9.0                                   |
|                                         | ST     |                   | 20.48    |                                    | 103.9                | 103.6           | 0.055                              | 3.6                                  | 7.9                                   |
| <i>Flavonoids – Flavonols</i>           |        |                   |          |                                    |                      |                 |                                    |                                      |                                       |
| Quercetin (Q)                           | S      | 360               | 23.98    | 0.05-100                           | -                    | 103.5           | 0.062                              | 0.2                                  | 1.1                                   |
|                                         | OO     |                   | 24.02    |                                    | 119.1                | 115.2           | 0.059                              | 0.6                                  | 12.8                                  |
|                                         | RW     |                   | 24.03    |                                    | 98.7                 | 107.9           | 0.062                              | 8.0                                  | 7.5                                   |
|                                         | ST     |                   | 24.03    |                                    | 114.7                | 100.8           | 0.060                              | 0.3                                  | 6.0                                   |

| phenolic compound                                                             | matrix | $\lambda$<br>(nm) | RT (min) | linearity<br>(mg L <sup>-1</sup> ) | matrix<br>effect (%) | accuracy<br>(%) | LOQ<br>(mg<br>kg/L <sup>-1</sup> ) | intra-day<br>precision (%,<br>N = 5) | inter-day<br>precision (%,<br>N = 15) |
|-------------------------------------------------------------------------------|--------|-------------------|----------|------------------------------------|----------------------|-----------------|------------------------------------|--------------------------------------|---------------------------------------|
| Quercetin 3-O-<br>galactoside (Q-3GAL)                                        | S      | 360               | 19.10    | 0.01-100                           | -                    | 94.3            | 0.020                              | 0.1                                  | 6.5                                   |
|                                                                               | OO     |                   | 19.12    |                                    | 87.0                 | 105.2           | 0.022                              | 0.3                                  | 7.0                                   |
|                                                                               | RW     |                   | 19.12    |                                    | 94.4                 | 110.4           | 0.020                              | 5.3                                  | 5.7                                   |
|                                                                               | ST     |                   | 19.12    |                                    | 96.0                 | 116.2           | 0.020                              | 0.1                                  | 6.1                                   |
| Quercetin 3-O-rutinoside<br>(Q-3RUT) / Quercetin 3-<br>O-glucoside (Q-3GLC)   | S      | 360               | 19.35    | 0.05-100                           | -                    | 95.9            | 0.056                              | 0.2                                  | 6.3                                   |
|                                                                               | OO     |                   | 19.36    |                                    | 84.0                 | 107.9           | 0.066                              | 1.4                                  | 6.1                                   |
|                                                                               | RW     |                   | 19.37    |                                    | 84.1                 | 106.7           | 0.066                              | 4.4                                  | 10.5                                  |
|                                                                               | ST     |                   | 19.37    |                                    | 92.2                 | 110.1           | 0.062                              | 0.2                                  | 6.1                                   |
| Quercetin 3-O-<br>rhamnoside (Q-3RHA) /<br>Kaempferol 3-glucoside<br>(K-3GLC) | S      | 360               | 20.61    | 0.05-100                           | -                    | 94.8            | 0.044                              | 0.1                                  | 6.4                                   |
|                                                                               | OO     |                   | 20.63    |                                    | 100.6                | 108.0           | 0.044                              | 1.5                                  | 6.5                                   |
|                                                                               | RW     |                   | 20.64    |                                    | 108.8                | 113.7           | 0.042                              | 4.7                                  | 4.7                                   |
|                                                                               | ST     |                   | 20.63    |                                    | 110.3                | 115.0           | 0.042                              | 0.3                                  | 6.2                                   |
| Kaempferol (K)                                                                | S      | 360               | 28.33    | 0.05-100                           | -                    | 103.2           | 0.081                              | 0.1                                  | 4.9                                   |

| phenolic compound                        | matrix | $\lambda$<br>(nm) | RT (min) | linearity<br>(mg L <sup>-1</sup> ) | matrix<br>effect (%) | accuracy<br>(%) | LOQ<br>(mg<br>kg/L <sup>-1</sup> ) | intra-day<br>precision (%,<br>N = 5) | inter-day<br>precision (%,<br>N = 15) |
|------------------------------------------|--------|-------------------|----------|------------------------------------|----------------------|-----------------|------------------------------------|--------------------------------------|---------------------------------------|
|                                          | OO     |                   | 28.35    |                                    | 118.7                | 126.7           | 0.080                              | 0.2                                  | 5.1                                   |
|                                          | RW     |                   | 28.38    |                                    | 107.5                | 103.5           | 0.081                              | 8.9                                  | 8.4                                   |
|                                          | ST     |                   | 28.36    |                                    | 124.4                | 126.6           | 0.081                              | 0.2                                  | 7.0                                   |
| Isorhamnetin (iR)                        | S      | 360               | 29.89    | 0.1-100                            | -                    | 87.3            | 0.12                               | 0.2                                  | 5.4                                   |
|                                          | OO     |                   | 29.90    |                                    | 103.8                | 104.4           | 0.12                               | 1.6                                  | 4.1                                   |
|                                          | RW     |                   | 29.94    |                                    | 90.5                 | 87.1            | 0.13                               | 8.2                                  | 12.7                                  |
|                                          | ST     |                   | 29.90    |                                    | 102.8                | 110.1           | 0.13                               | 0.2                                  | 6.7                                   |
| Isorhamnetin 3-O-<br>glucoside (iR-3GLC) | S      | 360               | 21.13    | 0.05-100                           | -                    | 86.1            | 0.042                              | 0.1                                  | 6.5                                   |
|                                          | OO     |                   | 21.14    |                                    | 101.1                | 97.3            | 0.042                              | 1.2                                  | 7.0                                   |
|                                          | RW     |                   | 21.16    |                                    | 105.1                | 100.3           | 0.041                              | 6.9                                  | 6.4                                   |
|                                          | ST     |                   | 21.16    |                                    | 111.8                | 111.5           | 0.042                              | 0.3                                  | 6.6                                   |
| Morin (MOR)                              | S      | 360               | 21.49    | 0.1-100                            | -                    | 84.3            | 0.14                               | 0.3                                  | 2.2                                   |
|                                          | OO     |                   | 21.51    |                                    | 96.9                 | 93.5            | 0.14                               | 1.1                                  | 6.5                                   |

| phenolic compound                | matrix | $\lambda$<br>(nm) | RT (min) | linearity<br>(mg L <sup>-1</sup> ) | matrix<br>effect (%) | accuracy<br>(%) | LOQ<br>(mg<br>kg/L <sup>-1</sup> ) | intra-day<br>precision (%,<br>N = 5) | inter-day<br>precision (%,<br>N = 15) |
|----------------------------------|--------|-------------------|----------|------------------------------------|----------------------|-----------------|------------------------------------|--------------------------------------|---------------------------------------|
|                                  | RW     |                   | 21.53    |                                    | 106.6                | 114.5           | 0.13                               | 6.4                                  | 5.7                                   |
|                                  | ST     |                   | 21.52    |                                    | 119.8                | 125.5           | 0.12                               | 1.4                                  | 7.0                                   |
| <i>Flavonoids – Flavones</i>     |        |                   |          |                                    |                      |                 |                                    |                                      |                                       |
| Luteolin (LUT)                   | S      | 360               | 25.14    | 0.1-100                            | -                    | 102.5           | 0.10                               | 0.1                                  | 6.0                                   |
|                                  | OO     |                   | 25.16    |                                    | 117.1                | 124.8           | 0.085                              | 0.2                                  | 6.5                                   |
|                                  | RW     |                   | 25.12    |                                    | 100.5                | 120.8           | 0.10                               | 8.4                                  | 9.3                                   |
|                                  | ST     |                   | 25.18    |                                    | 101.1                | 109.5           | 0.098                              | 0.5                                  | 6.3                                   |
| Apigenin (API)                   | S      | 360               | 28.64    | 0.05-100                           | -                    | 106.6           | 0.051                              | 0.1                                  | 5.7                                   |
|                                  | OO     |                   | 28.65    |                                    | 113.7                | 117.9           | 0.048                              | 0.1                                  | 6.4                                   |
|                                  | RW     |                   | 28.      |                                    | 110.8                | 104.8           | 0.049                              | 9.4                                  | 9.9                                   |
|                                  | ST     |                   | 28.66    |                                    | 114.3                | 118.7           | 0.049                              | 0.2                                  | 6.1                                   |
| <i>Flavonoids – Anthocyanins</i> |        |                   |          |                                    |                      |                 |                                    |                                      |                                       |
| Cyanidin (CYA)                   | S      | 520               | 9.64     | 1-50                               | -                    | 79.0            | 3.51                               | 2.6                                  | 7.5                                   |



| phenolic compound                    | matrix | $\lambda$<br>(nm) | RT (min) | linearity<br>(mg L <sup>-1</sup> ) | matrix<br>effect (%) | accuracy<br>(%) | LOQ<br>(mg<br>kg/L <sup>-1</sup> ) | intra-day<br>precision (%,<br>N = 5) | inter-day<br>precision (%,<br>N = 15) |
|--------------------------------------|--------|-------------------|----------|------------------------------------|----------------------|-----------------|------------------------------------|--------------------------------------|---------------------------------------|
|                                      | RW     |                   | 9.62     |                                    | 95.6                 | 95.2            | 3.58                               | 3.5                                  | 11.5                                  |
|                                      | ST     |                   | 9.62     |                                    | 98.6                 | 108.5           | 3.55                               | 1.9                                  | 13.2                                  |
| Cyanidin 3-O-glucoside<br>(CYA-3GLC) | S      | 520               | 7.46     | 0.01-50                            | -                    | 97.4            | 0.025                              | 0.2                                  | 1.1                                   |
|                                      | RW     |                   | 7.44     |                                    | 106.1                | 105.5           | 0.025                              | 6.0                                  | 5.3                                   |
|                                      | ST     |                   | 7.44     |                                    | 108.4                | 100.8           | 0.024                              | 0.1                                  | 0.8                                   |
| Malvidin (MAL)                       | S      | 520               | 12.52    | 1-50                               | -                    | 77.1            | 1.22                               | 0.5                                  | 13.7                                  |
|                                      | RW     |                   | 12.52    |                                    | 84.8                 | 101.7           | 1.33                               | 6.4                                  | 9.9                                   |
|                                      | ST     |                   | 12.52    |                                    | 120.3                | 116.0           | 1.21                               | 2.2                                  | 10.1                                  |
| Malvidin 3-O-glucoside<br>(MAL-3GLC) | S      | 520               | 9.81     | 0.01-50                            | -                    | 95.0            | 0.036                              | 0.4                                  | 0.8                                   |
|                                      | RW     |                   | 9.79     |                                    | 68.9                 | 84.2            | 0.044                              | 2.7                                  | 2.9                                   |
|                                      | ST     |                   | 9.8      |                                    | 118.3                | 103.7           | 0.031                              | 0.3                                  | 0.6                                   |
| Pelargonidin (PEL)                   | S      | 520               | 10.83    | 1-50                               | -                    | 81.5            | 1.74                               | 0.6                                  | 5.3                                   |
|                                      | RW     |                   | 10.86    |                                    | 97.2                 | 88.0            | 1.78                               | 2.2                                  | 8.5                                   |

| phenolic compound                         | matrix | $\lambda$<br>(nm) | RT (min) | linearity<br>(mg L <sup>-1</sup> ) | matrix<br>effect (%) | accuracy<br>(%) | LOQ<br>(mg<br>kg/L <sup>-1</sup> ) | intra-day<br>precision (%,<br>N = 5) | inter-day<br>precision (%,<br>N = 15) |
|-------------------------------------------|--------|-------------------|----------|------------------------------------|----------------------|-----------------|------------------------------------|--------------------------------------|---------------------------------------|
|                                           | ST     |                   | 10.85    |                                    | 60.5                 | 70.0            | 1.91                               | 1.3                                  | 11.7                                  |
| Pelargonidin 3-O-<br>glucoside (PEL-3GLC) | S      | 520               | 8.18     | 0.05-50                            | -                    | 101.9           | 0.047                              | 0.2                                  | 1.2                                   |
|                                           | RW     |                   | 8.18     |                                    | 111.2                | 111.3           | 0.048                              | 6.1                                  | 5.0                                   |
|                                           | ST     |                   | 8.16     |                                    | 100.8                | 102.3           | 0.045                              | 0.1                                  | 0.6                                   |
| Peonidin (PEO)                            | S      | 520               | 11.85    | 1-50                               | -                    | 79.0            | 2.73                               | 4.9                                  | 10.8                                  |
|                                           | RW     |                   | 11.84    |                                    | 115.8                | 111.7           | 2.46                               | 1.1                                  | 11.5                                  |
|                                           | ST     |                   | 11.85    |                                    | 80.0                 | 78.2            | 2.85                               | 6.6                                  | 13.3                                  |
| Peonidin 3-O-glucoside<br>(PEO-3GLC)      | S      | 520               | 9.08     | 0.01-50                            | -                    | 97.9            | 0.030                              | 0.4                                  | 1.2                                   |
|                                           | RW     |                   | 9.07     |                                    | 109.6                | 104.4           | 0.027                              | 5.5                                  | 4.8                                   |
|                                           | ST     |                   | 9.08     |                                    | 117.0                | 106.1           | 0.026                              | 0.2                                  | 0.8                                   |
| Delphinidin 3-O-glucoside<br>(DEL-3GLC)   | S      | 520               | 6.68     | 0.01-50                            | -                    | 96.3            | 0.028                              | 0.2                                  | 1.1                                   |
|                                           | RW     |                   | 6.66     |                                    | 102.3                | 98.2            | 0.030                              | 4.5                                  | 4.2                                   |
|                                           | ST     |                   | 6.66     |                                    | 110.7                | 99.6            | 0.025                              | 0.5                                  | 1.0                                   |

| phenolic compound                       | matrix | $\lambda$<br>(nm) | RT (min)                                   | linearity<br>(mg L <sup>-1</sup> ) | matrix<br>effect (%) | accuracy<br>(%) | LOQ<br>(mg<br>kg/L <sup>-1</sup> ) | intra-day<br>precision (%,<br>N = 5) | inter-day<br>precision (%,<br>N = 15) |
|-----------------------------------------|--------|-------------------|--------------------------------------------|------------------------------------|----------------------|-----------------|------------------------------------|--------------------------------------|---------------------------------------|
| Petunidin 3-O-glucoside<br>(PET-3GLC)   | S      | 520               | 8.39                                       | 0.05-50                            | -                    | 95.6            | 0.062                              | 0.4                                  | 1.6                                   |
|                                         | RW     |                   | 8.38                                       |                                    | 96.1                 | 93.6            | 0.058                              | 4.6                                  | 4.3                                   |
|                                         | ST     |                   | 8.37                                       |                                    | 106.1                | 91.6            | 0.055                              | 0.2                                  | 1.1                                   |
| <i>Internal standards</i>               |        |                   |                                            |                                    |                      |                 |                                    |                                      |                                       |
| 2,6-Dimethoxybenzoic<br>acid (2,6-DMBA) | S      | 280               | 9.44 <sup>†</sup> /<br>5.10 <sup>*</sup>   |                                    |                      |                 |                                    | 1.2 <sup>†</sup> / 3.5 <sup>*</sup>  | 6.9 <sup>†</sup> / 4.1 <sup>*</sup>   |
|                                         | OO     |                   | 9.43 <sup>†</sup>                          |                                    |                      |                 |                                    | 0.5 <sup>†</sup>                     | 7.5 <sup>†</sup>                      |
|                                         | RW     |                   | 9.42 <sup>†</sup> /<br>5.10 <sup>*</sup>   |                                    |                      |                 |                                    | 1.5 <sup>†</sup> / 2.9 <sup>*</sup>  | 5.7 <sup>†</sup> / 2.8 <sup>*</sup>   |
|                                         | ST     |                   | 9.40 <sup>†</sup> /<br>5.10 <sup>*</sup>   |                                    |                      |                 |                                    | 0.3 <sup>†</sup> / 3.6 <sup>*</sup>  | 6.9 <sup>†</sup> / 3.9 <sup>*</sup>   |
| Bisphenol A (BPA)                       | S      | 280               | 30.74 <sup>†</sup> /<br>13.72 <sup>*</sup> |                                    |                      |                 |                                    | 3.5 <sup>†</sup> / 2.1 <sup>*</sup>  | 7.3 <sup>†</sup> / 2.1 <sup>*</sup>   |

| phenolic compound | matrix | $\lambda$<br>(nm) | RT (min)                                   | linearity<br>(mg L <sup>-1</sup> ) | matrix<br>effect (%) | accuracy<br>(%) | LOQ<br>(mg<br>kg/L <sup>-1</sup> ) | intra-day<br>precision (%,<br>N = 5) | inter-day<br>precision (%,<br>N = 15) |
|-------------------|--------|-------------------|--------------------------------------------|------------------------------------|----------------------|-----------------|------------------------------------|--------------------------------------|---------------------------------------|
|                   | OO     |                   | 30.75 <sup>†</sup>                         |                                    |                      |                 |                                    | 2.4 <sup>†</sup>                     | 6.4 <sup>†</sup>                      |
|                   | RW     |                   | 30.81 <sup>†</sup> /<br>13.73 <sup>*</sup> |                                    |                      |                 |                                    | 7.3 <sup>†</sup> / 2.7 <sup>*</sup>  | 7.4 <sup>†</sup> / 2.2 <sup>*</sup>   |
|                   | ST     |                   | 30.78 <sup>†</sup> /<br>13.73 <sup>*</sup> |                                    |                      |                 |                                    | 1.5 <sup>†</sup> / 2.7 <sup>*</sup>  | 7.1 <sup>†</sup> / 2.4 <sup>*</sup>   |

For the internal standards, <sup>†</sup> refers to the retention times and validation parameters obtained for the RP-UHPLC-DAD method that was optimized for non-anthocyanin compounds, and \* refers to the retention times and validation parameters obtained for the RP-UHPLC-DAD method that was optimized for anthocyanin compounds.

**Table S3.** Concentrations of phenolic compounds detected in olive oil, red wine, strawberry, and urine samples. The results are expressed as mean  $\pm$  standard deviation of triplicate measurements (mg kg<sup>-1</sup> for olive oil and strawberry, mg L<sup>-1</sup> for red wine and urine). ND, non-detected.

|                                                   | olive oil         | red wine         | strawberry       | urine             |
|---------------------------------------------------|-------------------|------------------|------------------|-------------------|
| <i>phenolic acids - hydroxybenzoic acids</i>      |                   |                  |                  |                   |
| 4-Hydroxybenzoic acid (4-HBA)                     | 0.64 $\pm$ 0.0058 | ND               | ND               | 3.62 $\pm$ 0.050  |
| 3,4-Dihydroxybenzoic acid (3,4-DHBA)              | 2.10 $\pm$ 0.019  | 2.03 $\pm$ 0.22  | 20.52 $\pm$ 0.95 | 4.32 $\pm$ 0.017  |
| Vanillic acid (VA)                                | 0.46 $\pm$ 0.035  | 13.65 $\pm$ 0.67 | ND               | ND                |
| Gallic acid (GA)                                  | ND                | 53.40 $\pm$ 0.99 | 20.01 $\pm$ 1.28 | 6.21 $\pm$ 0.41   |
| Ethylgallate (EtGA)                               | ND                | 18.33 $\pm$ 0.70 | ND               | ND                |
| 4-O-Methylgallic acid (4-MeGA)                    | 0.24 $\pm$ 0.011  | ND               | ND               | ND                |
| Syringic acid (SYR)                               | ND                | 7.68 $\pm$ 0.29  | ND               | 2.28 $\pm$ 0.046  |
| <i>phenolic acids - hydroxyphenylacetic acids</i> |                   |                  |                  |                   |
| 3,4-Dihydroxyphenylacetic acid (3,4-DHPAA)        | ND                | ND               | 31.77 $\pm$ 0.98 | 25.93 $\pm$ 1.26  |
| <i>phenolic acids - hydroxycinnamic acids</i>     |                   |                  |                  |                   |
| trans-Cinnamic acid (tCA)                         | 0.30 $\pm$ 0.0052 | ND               | 10.33 $\pm$ 0.54 | 0.47 $\pm$ 0.0027 |
| o-Coumaric acid (oCOU)                            | 0.13 $\pm$ 0.0029 | ND               | ND               | 3.24 $\pm$ 0.089  |
| m-Coumaric acid (mCOU)                            | 0.41 $\pm$ 0.011  | 0.97 $\pm$ 0.072 | ND               | 0.65 $\pm$ 0.039  |

|                                        | <b>olive oil</b> | <b>red wine</b> | <b>strawberry</b> | <b>urine</b>     |
|----------------------------------------|------------------|-----------------|-------------------|------------------|
| p-Coumaric acid (pCOU)                 | 0.24 ±<br>0.0019 | 6.54 ± 0.50     | 11.54 ± 0.20      | 0.40 ± 0.022     |
| Caffeic acid (CA)                      | ND               | 9.53 ± 0.22     | ND                | 0.28 ±<br>0.0018 |
| Ferulic acid (FA)                      | 0.14 ±<br>0.0029 | ND              | ND                | ND               |
| Sinapic acid (SIN)                     | ND               | ND              | ND                | 0.91 ± 0.13      |
| <i>hydroxybenzaldehydes</i>            |                  |                 |                   |                  |
| 3,4-Dihydroxybenzaldehyde (3,4-DHBAld) | ND               | ND              | 12.40 ± 0.45      | 5.98 ± 0.54      |
| Vanillin (VAN)                         | 0.24 ±<br>0.0023 | ND              | ND                | ND               |
| <i>phenols</i>                         |                  |                 |                   |                  |
| 4-Ethylphenol (4-EtPh)                 | ND               | 16.38 ± 3.84    | ND                | ND               |
| <i>furan derivatives</i>               |                  |                 |                   |                  |
| Furfural (F)                           | 1.52 ±<br>0.062  | 1.15 ± 0.065    | 11.82 ± 0.25      | ND               |
| 5-(Hydroxymethyl)furfural (5-HMF)      | ND               | 0.44 ± 0.023    | ND                | ND               |
| 2,5-dimethyl-4-hydroxy-furanone (DMHF) | ND               | ND              | 26.86 ± 6.17      | ND               |
| <i>phenylethanoids</i>                 |                  |                 |                   |                  |
| Tyrosol (TYR)                          | 12.25 ±<br>0.074 | ND              | ND                | ND               |

|                                                                      | <b>olive oil</b> | <b>red wine</b>     | <b>strawberry</b>   | <b>urine</b> |
|----------------------------------------------------------------------|------------------|---------------------|---------------------|--------------|
| Hydroxytyrosol (HTYR)                                                | 16.31 ±<br>0.42  | ND                  | ND                  | ND           |
| Oleuropein (OLE)                                                     | 8.23 ±<br>0.65   | ND                  | ND                  | ND           |
| <i>tannins</i>                                                       |                  |                     |                     |              |
| Ellagic acid (EA)                                                    | ND               | 3308.51 ±<br>488.58 | 14194.67 ±<br>318.5 | ND           |
| <i>stilbenes</i>                                                     |                  |                     |                     |              |
| trans-Resveratrol (tRSV)                                             | ND               | 1.84 ± 0.32         | ND                  | ND           |
| trans-Resveratrol 3-O-glucoside (tRSV-3GLC)                          | ND               | 2.30 ± 0.16         | ND                  | ND           |
| <i>flavonoids - flavan-3-ols</i>                                     |                  |                     |                     |              |
| Catechin (C)                                                         | 0.72 ±<br>0.042  | 21.23 ± 1.08        | 37.64 ± 1.13        | ND           |
| Epicatechin (EC)                                                     | ND               | 11.38 ± 0.30        | 45.43 ± 2.86        | ND           |
| Epicatechin gallate (ECG)                                            | ND               | 2.77 ± 0.14         | 44.76 ± 1.03        | ND           |
| <i>flavonoids - flavonols</i>                                        |                  |                     |                     |              |
| Quercetin (Q)                                                        | 0.87 ±<br>0.027  | 9.38 ± 1.86         | 1.65 ± 0.071        | ND           |
| Quercetin 3-O-galactoside (Q-3GAL)                                   | ND               | ND                  | 11.08 ± 0.36        | ND           |
| Quercetin 3-O-rutinoside (Q-3RUT) / Quercetin 3-O-glucoside (Q-3GLC) | ND               | ND                  | 17.25 ±<br>0.051    | ND           |

|                                                                       | <b>olive oil</b> | <b>red wine</b> | <b>strawberry</b> | <b>urine</b> |
|-----------------------------------------------------------------------|------------------|-----------------|-------------------|--------------|
| Quercetin 3-O-rhamnoside (Q-3RHA) / Kaempferol 3-O-glucoside (K-3GLC) | ND               | ND              | 8.91 ± 0.38       | ND           |
| Kaempferol (K)                                                        | ND               | 0.97 ± 0.19     | 1.02 ± 0.12       | ND           |
| <i>flavonoids - flavones</i>                                          |                  |                 |                   |              |
| Luteolin (LUT)                                                        | 6.95 ± 0.039     | ND              | ND                | ND           |
| Apigenin (API)                                                        | 1.47 ± 0.028     | ND              | ND                | ND           |
| <i>flavonoids - anthocyanins</i>                                      |                  |                 |                   |              |
| Cyanidin 3-O-glucoside (CYA-3GLC)                                     | ND               | 1.52 ± 0.026    | ND                | ND           |
| Malvidin 3-O-glucoside (MAL-3GLC)                                     | ND               | 44.47 ± 0.033   | ND                | ND           |
| Pelargonidin (PEL)                                                    | ND               | ND              | 84.73 ± 5.71      | ND           |
| Pelargonidin 3-O-glucoside (PEL-3GLC)                                 | ND               | ND              | 62.48 ± 5.09      | ND           |
| Peonidin 3-O-glucoside (PEO-3GLC)                                     | ND               | 4.40 ± 0.053    | 7.08 ± 0.67       | ND           |
| Delphinidin 3-O-glucoside (DEL-3GLC)                                  | ND               | 11.07 ± 0.058   | ND                | ND           |
| Petunidin 3-O-glucoside (PET-3GLC)                                    | ND               | 13.17 ± 0.096   | ND                | ND           |
